# Supplementary material for: Effect of using immobilization device in fluoroscopic study in pediatric patient: Focused on radiation dose reduction in voiding cystourethrogram
Source: PLoS One. 2019 Oct 18;14(10):e0224063. doi: 10.1371/journal.pone.0224063 (PMC6799906; doi:10.1371/journal.pone.0224063)
Supplement: S1 Table — (XLSX) [file pone.0224063.s001.xlsx]

## Sheet: Sheet1
	Shot			Fluoroscopy					Image quality						Clinical data
Group	Shot number	Mean KVP	Mean Mas	Mean time	Mean KVP	Mean Mas	DAP		Overall	Motion artifact	External artifact	Inadequate timing	Inadequate centering	Discomfort	Age	Bodyweight	Height
1	8	79.25	5.42	117	76	3.7	469.5	3	4	1	1	1	1	2	4	6	60.5
1	8	76.5	5.24	140	73	3.2	598.1	1	4	0	1	0	0	2	6	8	65.4
1	8	77.25	4.61	95	74	3.4	354.6	4	4	0	0	0	0	2	5	7	70.5
1	8	73.63	4.81	197	69	27	237.1	2	4	0	0	0	0	2	3	4	61.2
1	8	78	4.53	126	72	3.1	339.8	4	4	0	0	0	0	2	4	6	62.4
1	8	78	5.08	161	74	3.2	639.8	3	4	0	0	0	0	2	8	9	73.1
1	8	78.75	7.9	178	68	2.5	228	19	4	0	0	0	0	2	12	13	77.6
1	8	75.13	6.93	123	72	3.2	506.5	23	4	0	0	0	0	2	6	7	69.1
1	8	78.58	8.8	148	77	3.3	265.6	4	4	0	0	0	0	2	5	6.2	62.9
1	8	79.88	9.08	143	74	3.4	216.3	7	4	0	0	0	0	2	3	5	60.4
1	8	76.88	4.83	156	72	3.4	368.5	2	5	0	0	0	0	2	2	4.9	59.1
1	8	76.25	6.84	207	72	3.1	375.3	4	5	0	0	0	0	2	15	14	76.6
1	8	77.38	7.34	123	73	3.2	296	4	5	0	0	0	0	2	3	7	70.3
1	8	75.88	7.87	286	71	3	520.3	8	3	0	0	0	0	2	2	5.2	68.4
1	8	75.25	6.86	140	68	2.5	196	6	3	0	0	0	0	2	15	16	102
1	8	76	7.47	206	69	2.8	307.6	2	3	0	0	0	0	2	12	12	94
1	8	76	5.3	169	72	3.1	339.7	5	4	1	1	0	1	2	11	12	78
1	8	76.63	6.2	195	71	2.7	204.5	1	4	0	0	0	0	2	5	7.2	67.1
1	12	76.85	8.75	187	76	3.7	361.4	5	4	0	0	0	0	2	4	6	66
1	8	78.38	7.36	187	71	3	302.5	1	4	0	0	0	1	2	8	8	71.1
1	8	75.88	5.87	166	71	2.9	204.5	6	4	0	0	0	1	2	10	10	74
1	12	81.75	9.51	130	77	3.8	282.2	5	4	0	0	0	0	2	9	10	72
1	8	66.75	5.6	129	2.6	2.6	164.6	1	4	0	1	1	0	2	7	7	66
1	8	66.75	5.6	85	75	2.8	495	1	4	0	0	0	0	2	8	7.9	69
1	12	78	7.82	204	71	2.9	276.2	12	4	0	0	0	0	2	10	12.9	84
1	8	73.25	3.23	131	67	2.4	220.6	1	4	0	1	0	0	2	4	6.2	61.4
1	8	76.75	6.85	186	72	2.5	333	2	4	0	0	0	0	2	2	4.8	59
1	6	76.88	7.51	116	72	3.1	183.4	2	4	0	0	0	0	3	3	5.6	5
1	6	75.25	6.76	116	72	2.5	194.2	33	4	0	0	0	0	1	5.8	8	68
1	6	78.88	8.04	86	72	3.1	160.2	1	4	0	0	0	0	3	16	16	98
1	8	76.92	6.94	145	73	3.2	291	3	4	0	0	0	0	3	10	9	82
1	8	73.75	4.34	128	66	2.2	61.1	1	4	0	0	0	0	3	3	6	64.4
1	8	77.25	4.48	100	74	3.4	328	1	4	0	0	0	0	1	2	3	46
1	6	72	3.48	213	73	3.2	167.6	2	4	1	1	0	0	3	5	8.2	68
1	8	76.92	6.94	110	72	3.1	164.5	5	3	0	0	0	0	1	3	7	42
1	8	73	3.5	136	73	3.2	196.5	3	3	0	0	0	0	1	8	10.9	90
1	8	77.2	4.9	196	72	3	583.7	9	3	0	0	0	0	1	4	4	64
1	8	78.88	9.21	131	75	3.5	355.7	5	3	0	0	0	0	1	4	4.3	68
1	8	75.5	6.23	210	70	2.8	424.7	16	3	0	0	0	0	1	3	4	60.2
1	8	76.13	7.79	139	72	3.1	386.1	14	3	0	0	0	0	1	6	7.6	71
1	8	75.25	6.28	128	71	2.9	223.8	18	4	0	0	0	0	1	6	6.2	68
2	8	80	9.51	258	70	2.8	407.1	4	4	1	1	1	1	2	5	5.8	61
2	8	78.25	7.07	95	71	2.9	473.1	3	4	1	1	0	1	2	7	7.2	72
2	4	74.5	5.74	99	68	2.5	166	3	4	1	1	0	0	2	4	6.2	70
2	8	76.75	6.64	105	71	2.9	252.4	6	4	1	0	0	1	2	12	10	79
2	8	75.25	6.76	116	72	2.5	194.2	21	4	1	1	0	1	2	6	6.5	68
2	8	74.88	5.47	185	68	2.6	693.1	6	5	1	0	0	1	2	2	5	63
2	8	77.25	7.65	198	71	2.8	500.7	16	5	0	0	0	0	2	7	6.9	68
2	8	74.88	5.25	132	70	2.8	338.7	4	5	1	0	0	1	2	3	5.2	58.2
2	8	76.5	5.91	108	68	2.5	206.3	2	5	0	0	0	0	2	11	10.3	78
2	8	76.5	7.79	240	69	2.7	584.9	6	5	1	0	1	1	2	4	5.9	63
2	12	75.25	6.76	214	68	2.5	168.1	1	5	0	0	0	0	2	2	4.1	69
2	8	76.25	7.15	93	70	2.8	237.4	4	5	0	0	0	0	3	9	7.8	76
2	8	68.75	10.55	119	69	2.7	236.9	6	5	0	0	0	0	3	5	8	69
2	8	75.25	6.76	198	70	2.8	304.4	1	5	1	0	0	1	3	3	6	94
2	8	77.88	9.48	215	70	2.7	227	6	5	0	0	0	0	2	2	5	58
2	8	76.13	8.18	274	72	3.1	1228.5	4	5	0	0	0	0	2	15	13	82
2	28	75.25	6.76	454	71	3.3	2199.1	18	5	0	0	1	1	2	12	10	77.7
2	8	74.88	5.5	207	60	2.5	328.4	1	5	1	1	1	1	2	3	4.2	52.1
2	8	76.5	5.98	111	72	2.78	297.5	2	5	0	0	0	0	2	4	5.8	65
2	12	75.25	6.76	250	69	2.7	599.1	2	5	0	0	0	0	2	6	6.2	67
2	12	77.33	5.05	204	72	3.1	715.5	5	5	0	0	0	0	2	5	6	66
2	12	78	10.1	123	72	3.1	224.3	3	5	0	1	0	1	3	2	5	65
2	8	76.39	7.31	226	71	2.9	418	9	5	0	0	0	0	3	4	6.2	66
2	8	78.88	7.51	250	70	2.8	606.7	5	5	1	1	1	1	3	5	6.9	69
2	16	77.94	8.37	227	75	3.5	661.5	1	5	0	0	0	0	3	10	10	74
2	12	76.58	6.67	284	71	2.9	240.7	15	5	1	1	0	0	3	11	12	81
2	8	75.38	5.63	217	68	2.6	438.3	4	5	0	0	0	0	1	2	6	58
2	12	66.75	5.6	70	68	2.5	1717.5	1	5	0	0	0	0	1	9	8	73
2	12	73.25	3.23	284	74	3.4	935.1	2	5	0	0	0	0	1	7	7	71
2	12	76.75	6.64	60	73	3.2	1409.8	8	5	0	0	0	0	1	3	6.2	62
2	8	78.13	5.65	201	75	2.9	1410.8	3	5	0	0	0	0	1	3	6	61
2	8	78.38	6.42	215	75	3.3	704.8	5	5	1	0	0	1	1	2	4.9	58
2	8	77	5.61	191	72	3.2	684.9	4	5	0	0	1	1	1	5	6.8	66
2	8	76.88	8.08	220	70	3.2	1006.7	5	4	0	0	0	0	1	5	6.1	65
2	11	78.64	5.17	139	70	3.5	695.2	23	4	1	0	0	1	1	6	6.9	71
2	12	75.69	7.55	325	70	2.8	790.5	18	4	0	0	0	0	1	6	8	72
